# Supplementary material for: Annona cherimola Seed Extracts Trigger an Early Apoptosis Response and Selective Anticlonogenic Activity against the Human Gastric Carcinoma Cell Line SNU-1
Source: MDPI journal article supplement (doi:10.3390/molecules28196906), 2023-10-02
Supplement: s1 [file s1]

## Supplementary Materials

# *Annona cherimola* Seed Extracts Trigger an Early Apoptosis Response and Selective Anticlonogenic Activity against the Human Gastric Carcinoma Cell Line SNU-1

Johan Macuer-Guzmán <sup>1,2</sup>, Claudia Giovagnoli-Vicuña <sup>3</sup>, Giuliano Bernal <sup>4</sup>, Lorena Lobos-González <sup>5</sup>, Erwin de la Fuente-Ortega <sup>6</sup>, Michael Araya-Castillo <sup>7</sup> and Cristian Ibáñez <sup>1,8,\*</sup>

- <sup>1</sup> Laboratorio de Silvigenómica y Biotecnología, Departamento de Biología, Facultad de Ciencias, Universidad de La Serena, Avenida Raúl Bitrán 1305, Casilla 599, La Serena 1700000, Chile; johan.macuer@udalba.cl
- <sup>2</sup> Facultad de Ciencias Agropecuarias, Universidad del Alba, Cuatro Esquinas 060, 1700000 La Serena, Chile
- <sup>3</sup> Departamento de Química Inorgánica, Facultad de Química y de Farmacia, Pontificia Universidad Católica de Chile, Avenida Vicuña Mackenna 4860, Macul, Santiago 7810000, Chile; ccgiovagnoli@uc.cl
- <sup>4</sup> Laboratorio de Biología Molecular y Celular del Cáncer (CáncerLab), Departamento de Ciencias Biomédicas, Facultad de Medicina, Universidad Católica del Norte, Larrondo 1281, Coquimbo 1781421, Chile; gbernal@ucn.cl
- <sup>5</sup> Centro de Medicina Regenerativa, Facultad de Medicina-Clínica Alemana, Universidad del Desarrollo, Avenida las Condes 12438, Lo Barnechea, Santiago 7710162, Chile; llobos@udd.cl
- <sup>6</sup> Laboratorio de Estrés Celular y Enfermedades Crónicas no Transmisibles, Núcleo de Investigación en Prevención y Tratamiento de Enfermedades Crónicas no Transmisibles (NiPTEC), Departamento de Ciencias Biomédicas, Facultad de Medicina, Universidad Católica del Norte, Coquimbo 1781421, Chile; edelafuente@ucn.cl
- <sup>7</sup> Centro de Investigación y Desarrollo Tecnológico de Algas (CIDTA), Facultad de Ciencias del Mar, Universidad Católica del Norte, Larrondo 1281, Coquimbo 1781421, Chile; mmaraya@ucn.cl
- <sup>8</sup> Instituto Multidisciplinario de Investigación y Postgrado, Universidad de La Serena, Avenida Raúl Bitrán 1305, Casilla 599, La Serena 1700000, Chile
- \* Correspondence: cibanez@userena.cl; Tel.: +56-51-2204309 or +56-51-2204383

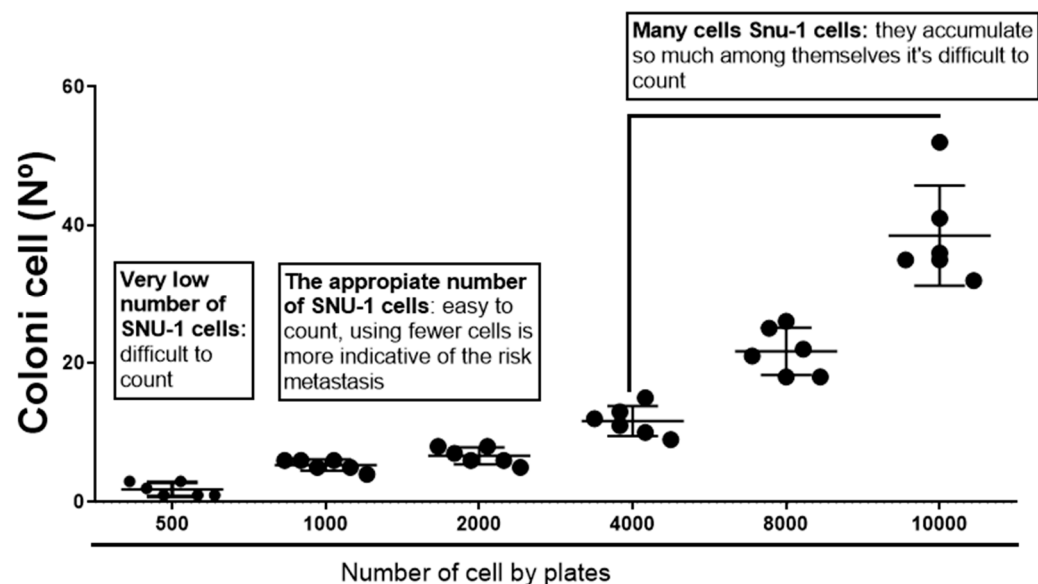

**Figure S1.** Determination of appropriate number of SNU-1 cells for anchored growth independent assay.

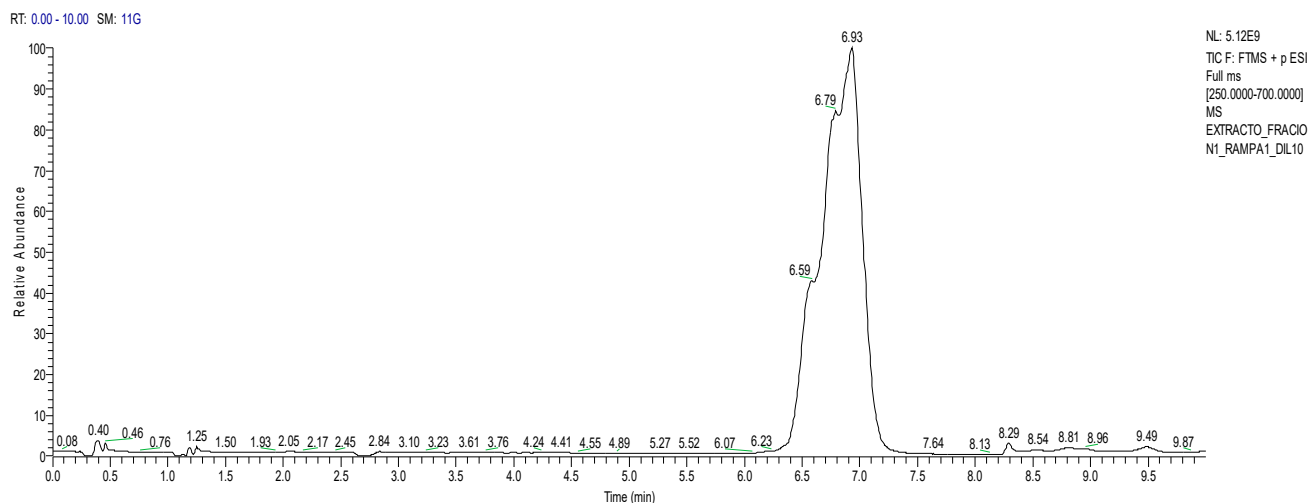

**Figure S2.** EMCHS extract chromatogram, full scan mode.

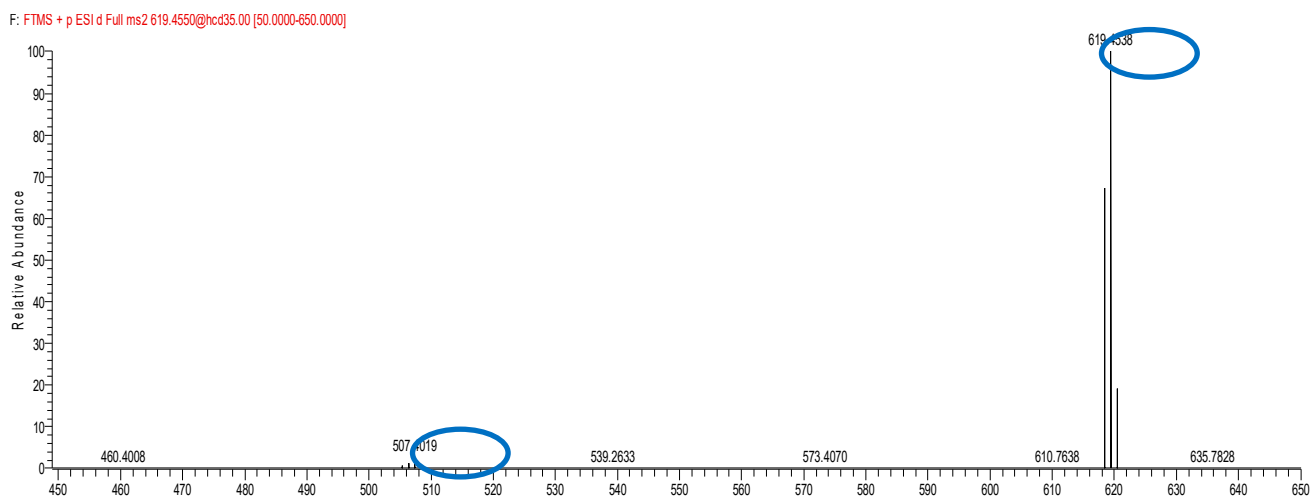

**Figure S3.** Production of mass spectra (MS/MS) adduct  $[M+Na]^+$  of annonacine.

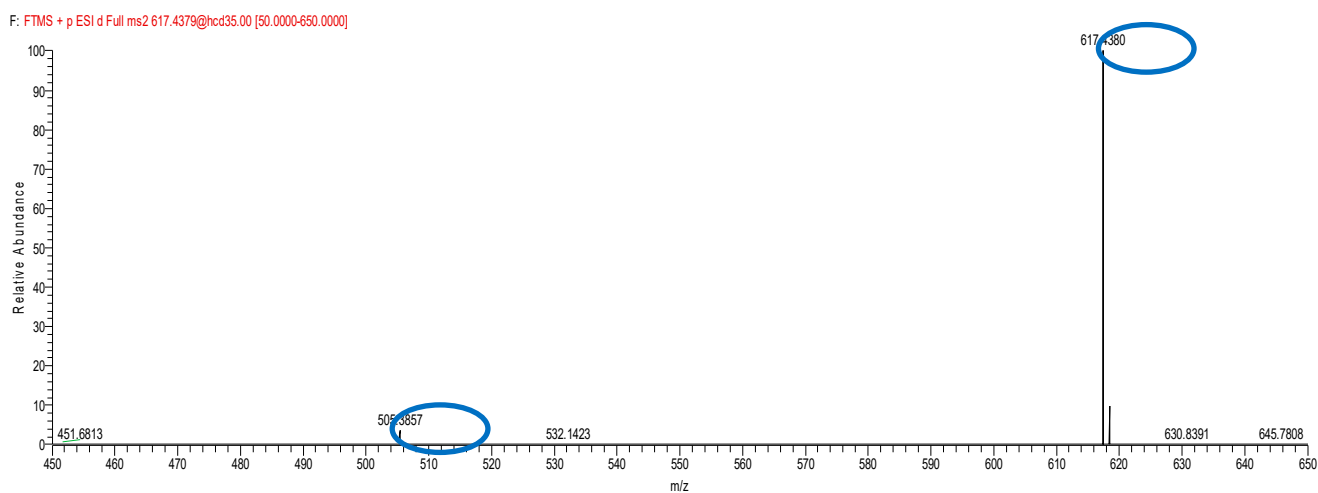

**Figure S4.** Production of mass spectra (MS/MS) of adducts  $[M+Na]^+$  of annonacinone.
